# Supplementary material
Source: Royal Society of Chemistry journal article supplement (doi:10.1039/d6se00080k)
Supplement: d6se00080k1.pdf [file d6se00080k1.pdf]

# Supporting Information

## Electrooxidation of Ethanol to Acetate on Mixed-Phase Nickel-Manganese

### Composites in Alkaline Environment

Huiyan Pan,<sup>a</sup> Yongshuai Lu,<sup>a</sup> Xiaohang Liu,<sup>a</sup> Xueguo Liu,<sup>a</sup> Yi Ma,<sup>bc</sup> Jing Yu,<sup>c</sup> Liang Xu,<sup>d</sup> Jialing Tang,<sup>bc</sup> Yongfa Zhu,<sup>f</sup> and Junshan Li<sup>b\*</sup>

*a School of Biological and Chemical Engineering, Nanyang Institute of Technology, Nanyang 473004, China*

*b Institute for Advanced Study, Chengdu University, Chengdu 610106, China*

*c Catalonia Institute for Energy Research - IREC, Sant Adrià de Besòs, Barcelona, 08930, Catalonia, Spain.*

*d Henan Fusen new energy Technology Co., LTD, Industrial Road, Xichuan Industrial Park, Xichuan County, Nanyang 474450, China*

*e Department of Environmental Engineering, School of Architecture and Civil Engineering, Chengdu University, Chengdu 610106, China*

*f Department of Chemistry, Tsinghua University, Beijing, 100084, China*

## SEM-EDS characterization

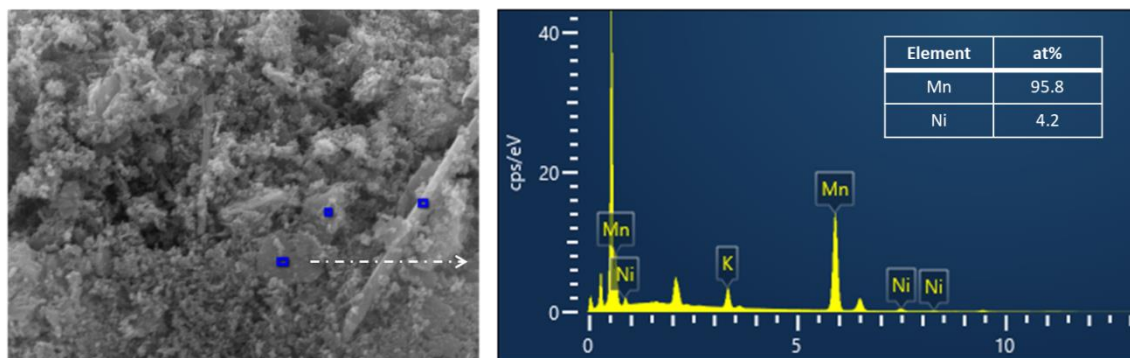

**Figure S1.** SEM-EDS measurement for the NiMnO<sub>x</sub> samples that were produced with Ni/Mn precursor ratio of 5/95.

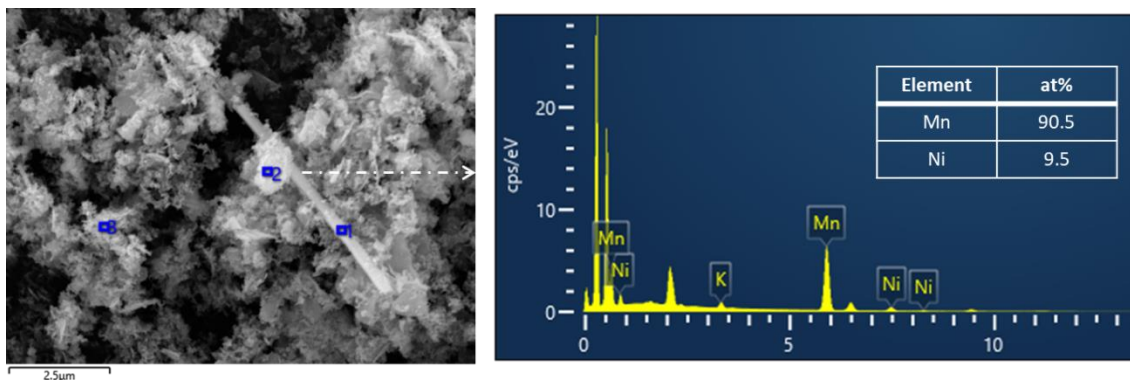

**Figure S2.** SEM-EDS measurement for the NiMnO<sub>x</sub> samples that were produced with Ni/Mn precursor ratio of 10/90.

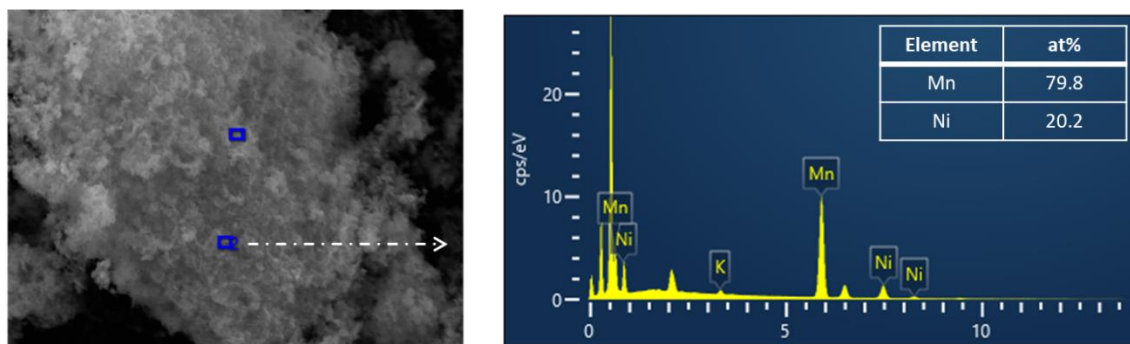

**Figure S3.** SEM-EDS measurement for the NiMnO<sub>x</sub> samples that were produced with Ni/Mn precursor ratio of 25/75.

## NMR spectra

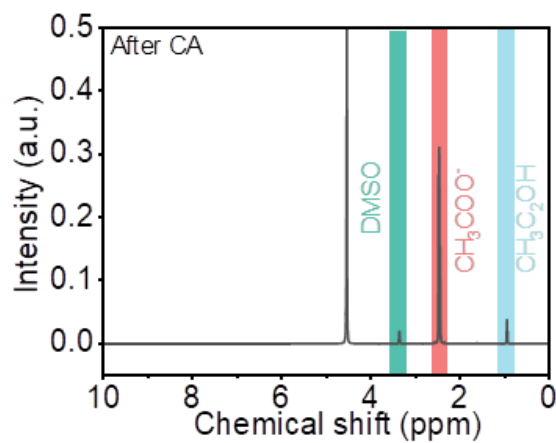

**Figure S4.** NMR spectra of the electrolyte after 12 h CA in 1 M KOH with the presence of 1 M ethanol.

## Post-EOR characterization

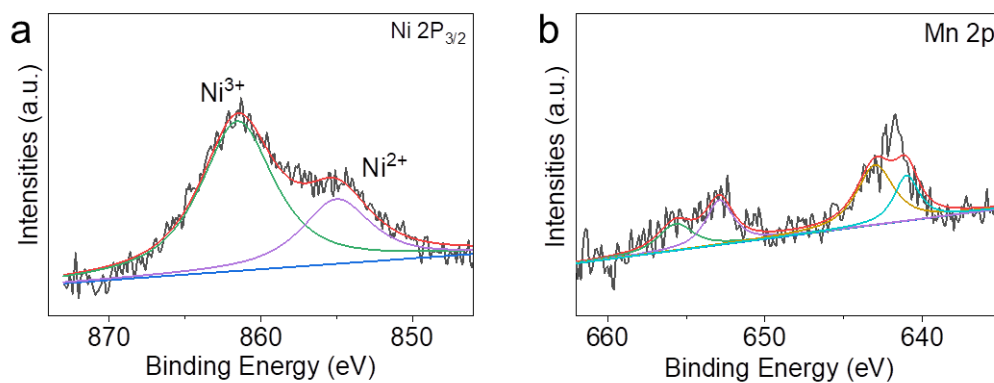

**Figure S5.** XPS spectra in the (a) Ni 2P<sub>3/2</sub>, and (b) Mn 2P region of the 5NiMnO<sub>x</sub> electrocatalyst after 12 h CA operation in 1 M KOH with the presence of 1 M ethanol.

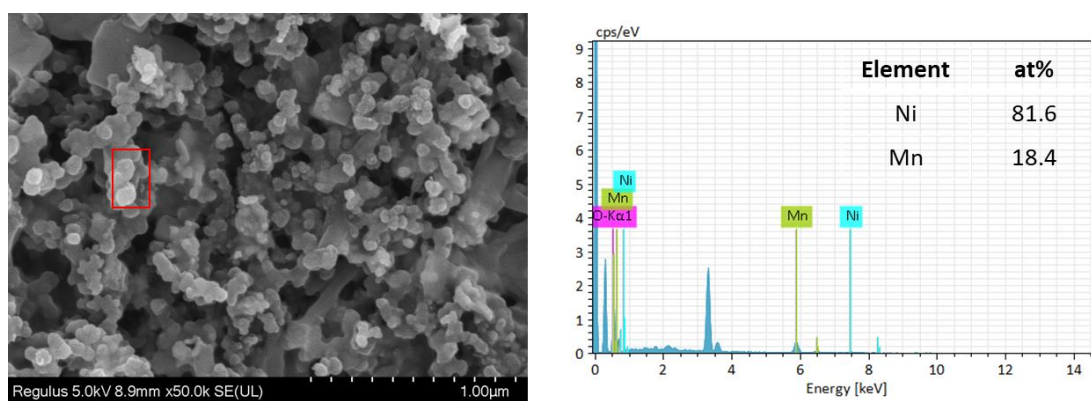

**Figure S6.** SEM-EDS results of the 5NiMnO<sub>x</sub> electrocatalyst after 12 h CA operation in 1 M KOH with the presence of 1 M ethanol.
